# Supplementary material for: The effect of magnetic coupling on magneto-caloric behaviour in two 3D Gd(iii)–glycolate coordination polymers
Source: Royal Society of Chemistry journal article supplement (doi:10.1039/c5qi00208g), 2015-11-17
Supplement: c5qi00208g1.pdf [file c5qi00208g1.pdf]

## Supporting Information

### The effect of magnetic coupling on magneto-caloric behaviour in two 3D Gd(III)-glycolate coordination polymers

Jiang-Zhen Qiu,<sup>a</sup> Yan-Cong Chen,<sup>a</sup> Long-Fei Wang,<sup>a</sup> Quan-wen Li,<sup>a</sup> Martin Orendáč,<sup>b</sup> and Ming-Liang Tong,<sup>\*a</sup>

<sup>a</sup> Key Laboratory of Bioinorganic and Synthetic Chemistry of Ministry of Education, School of Chemistry & Chemical Engineering, Sun Yat-Sen University, 510275 Guangzhou, P. R. China. E-mail: tongml@mail.sysu.edu.cn

<sup>b</sup> prof. Dr. Martin Orendáč Centre of Low Temperature Physics Faculty of Science Laboratory Institute of Experimental Physics SAS P. J. Šafárik University Park Angelinum 9, 04013 Košice, Slovakia E-mail: martin.orendac@upjs.sk

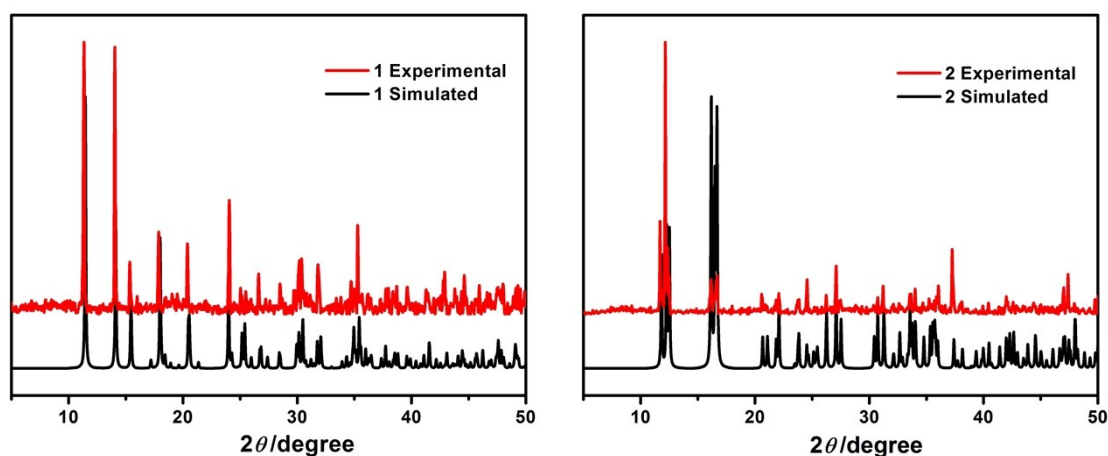

Fig. S1 Simulated and experimental X-ray powder diffraction patterns for 1 (left) and 2 (right).

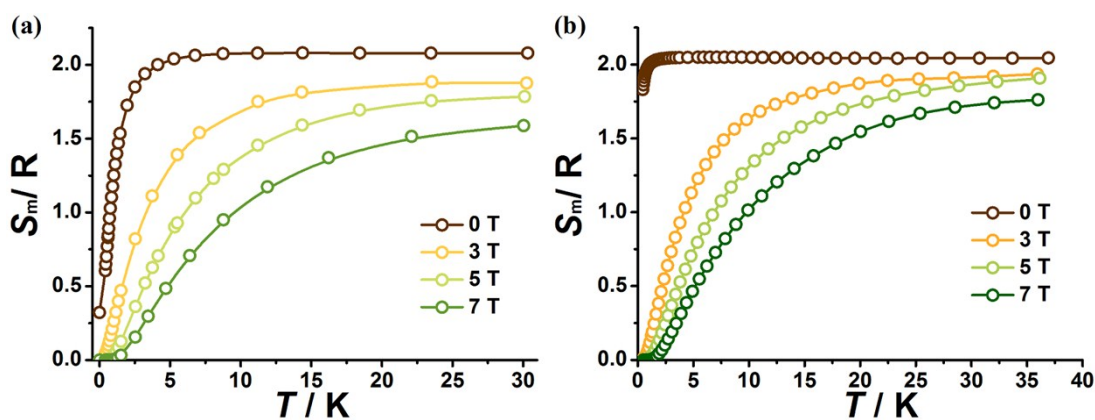

Fig. S2 Temperature-dependent  $S_m/R$  in selected applied fields for 1 (a) and 2 (b). Lines are guides to the eyes.

**Table S1.** Crystallographic Data and Structural Refinements for **1** and **2**.

| <b>Complex</b>                                        | <b>1</b>                                       | <b>2</b>                                       |
|-------------------------------------------------------|------------------------------------------------|------------------------------------------------|
| <b>Formula</b>                                        | C <sub>4</sub> H <sub>9</sub> GdO <sub>8</sub> | C <sub>6</sub> H <sub>9</sub> GdO <sub>9</sub> |
| <b><i>M<sub>r</sub></i></b>                           | 342.36                                         | 382.38                                         |
| <b>Crystal system</b>                                 | monoclinic                                     | monoclinic                                     |
| <b>Space group</b>                                    | <i>P</i> 2 <sub>1</sub> / <i>c</i>             | <i>P</i> 2 <sub>1</sub>                        |
| <b><i>a</i>[Å]</b>                                    | 6.2789(3)                                      | 8.1242(11)                                     |
| <b><i>b</i>[Å]</b>                                    | 9.0295(6)                                      | 8.0394(13)                                     |
| <b><i>c</i>[Å]</b>                                    | 14.8336(9)                                     | 8.4324(12)                                     |
| <b><i>α</i>[°]</b>                                    | 90                                             | 90                                             |
| <b><i>β</i>[°]</b>                                    | 92.585(2)                                      | 117.490(4)                                     |
| <b><i>γ</i>[°]</b>                                    | 90                                             | 90                                             |
| <b><i>V</i>[Å<sup>3</sup>]</b>                        | 840.14(9)                                      | 488.57(13)                                     |
| <b><i>Z</i></b>                                       | 4                                              | 2                                              |
| <b><i>ρ</i><sub>calcd</sub>[mg mm<sup>-3</sup>]</b>   | 2.707                                          | 2.599                                          |
| <b><i>T</i>[K]</b>                                    | 150                                            | 150                                            |
| <b>Goof on F<sup>2</sup></b>                          | 1.035                                          | 1.099                                          |
| <b><i>R</i><sub>1</sub>[I&gt;2σ(I)]<sup>[a]</sup></b> | 0.0292                                         | 0.0423                                         |
| <b><i>wR</i><sub>2</sub>[all data]<sup>[b]</sup></b>  | 0.0729                                         | 0.1001                                         |

[a]  $R_1 = \sum ||F_o| - |F_c|| / \sum |F_o|$ , [b]  $wR_2 = [\sum w(F_o^2 - F_c^2)^2 / \sum w(F_o^2)^2]^{1/2}$ .
